# Supplementary figures and images for: Global Sensitivity Analysis of the Advanced ORYZA-N Model with Different Rice Types and Irrigation Regimes
Source: MDPI journal article supplement (doi:10.3390/plants13020262), 2024-01-17

Single Rice

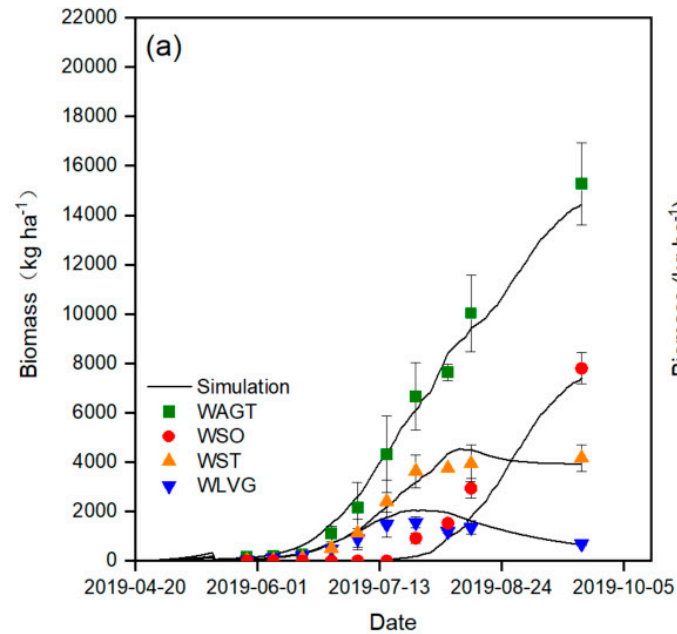

Early Rice

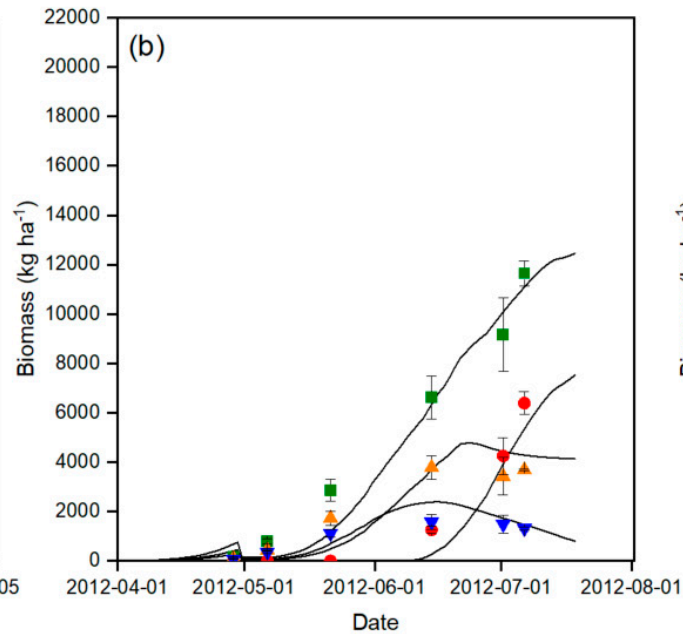

Late Rice

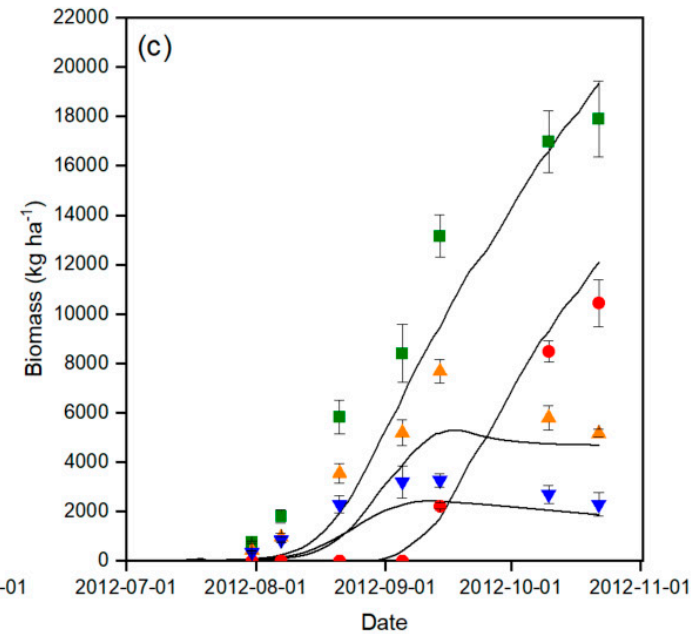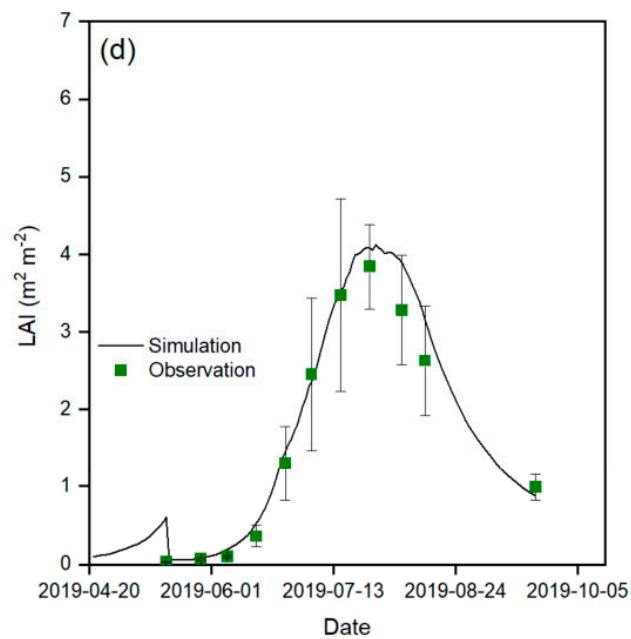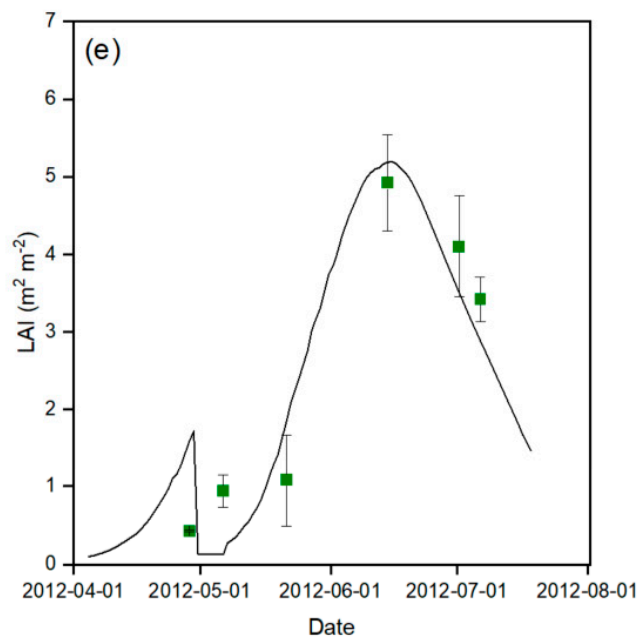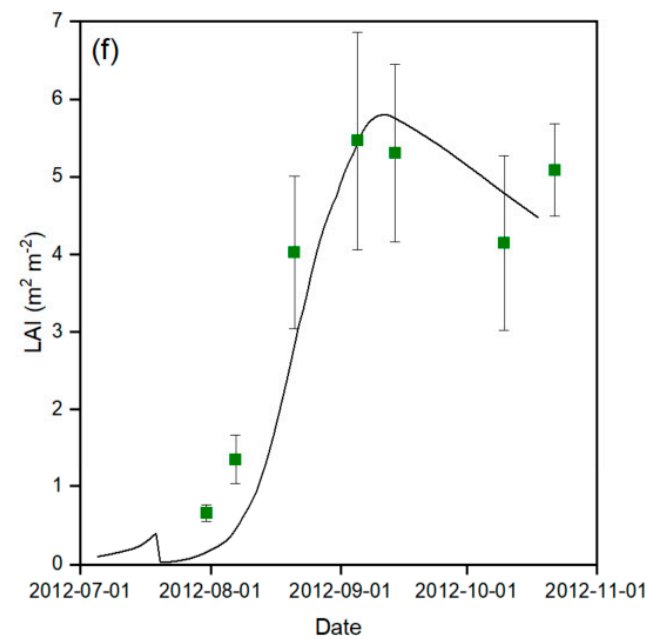

Supplement: s1 [file s1]
